# Supplementary figures and images for: The structure of the myosin VI motor reveals the mechanism of directionality reversal
Source: Springer Nature journal article supplement (doi:10.1038/nature03592), 2005-06-01

# Myosin VI

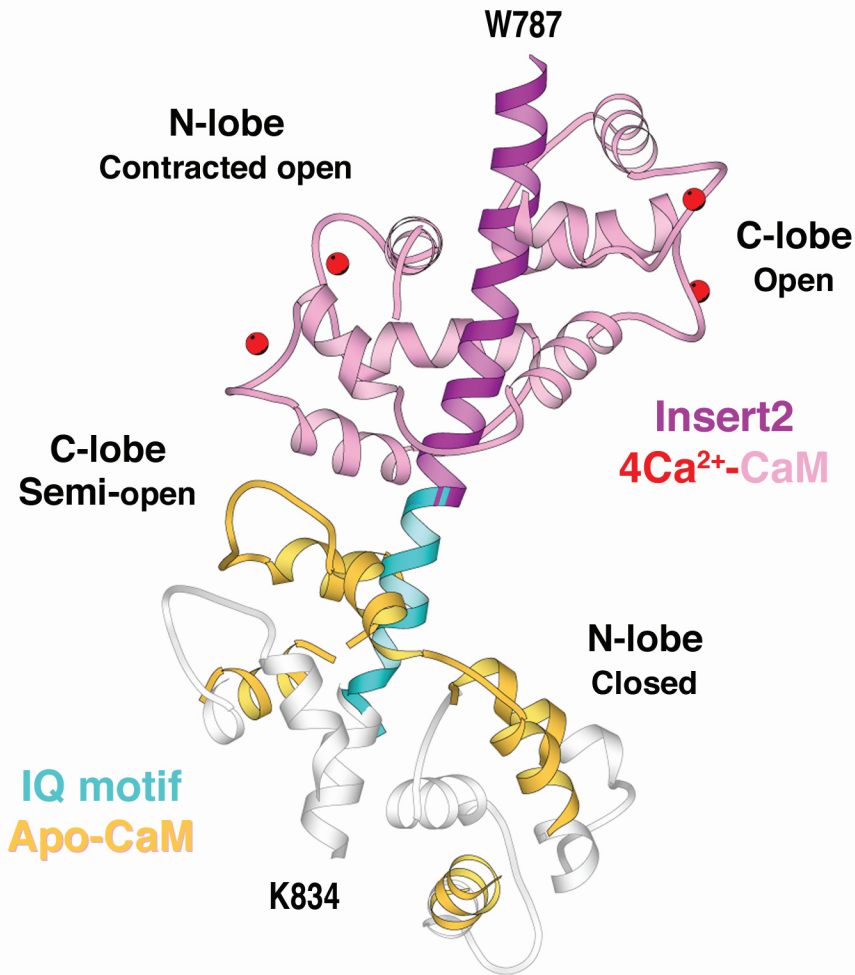

Supplement: 41586_2005_BFnature03592_MOESM5_ESM.pdf [file 41586_2005_BFnature03592_MOESM5_ESM.pdf]
